# Supplementary material for: Recurrent acute liver failure in alanyl-tRNA synthetase-1 (AARS1) deficiency
Source: PubMed Central journal article supplement — Mol Genet Metab Rep. 2020 Nov 22;25:100681. doi: 10.1016/j.ymgmr.2020.100681 (PMC7691605; doi:10.1016/j.ymgmr.2020.100681), 2020-11-22
Supplement: mmc1.pdf [file mmc1.pdf]

## Supplementary Materials

### Recurrent acute liver failure in alanyl-tRNA synthetase-1 (AARS1) deficiency

Lara M. Marten<sup>a</sup>, MD, Florian Brinkert<sup>a</sup>, MD, Desirée E.C. Smith<sup>b</sup>, Dr. ing.,  
Holger Prokisch<sup>c</sup>, PhD, Maja Hempel<sup>d\*</sup>, MD, René Santer<sup>a\*</sup>, MD

\* These authors contributed equally to this work

#### Supplementary Table 1

Summary of clinical symptoms of patients with  
autosomal recessive aaRS deficiencies and liver symptoms ..... S2

Legend to Supplementary Table 1 ..... S3

Supplementary Figure 1 ..... S4

#### Legend to Supplemental Figure 1

Enzymatic and molecular genetic findings of the reported patient ..... S5

Supplementary References ..... S6

**Table 1. Summary of clinical symptoms of patients with autosomal recessive aaRS deficiencies and liver symptoms.**

|                                       |                                       |                          | cytosolic |       |       |       |       |       |       | This report |
|---------------------------------------|---------------------------------------|--------------------------|-----------|-------|-------|-------|-------|-------|-------|-------------|
|                                       |                                       |                          | GARS      | IARS1 | LARS1 | MARS1 | FARS1 | YARS1 | AARS1 | AARS1       |
|                                       |                                       | N                        | 22        | 6     | 25    | 32    | 6     | 10    | 5     | 1           |
| Central nervous system                | MRI abnormalities                     |                          | ■         | ■     | ■     | ■     | ■     | ■     | ■     | ■           |
|                                       | Psychomotor retardation               |                          | ■         | ■     | ■     | ■     | ■     | ■     | ■     | ■           |
|                                       | Microcephaly                          |                          | ■         | ■     | ■     | ■     | ■     | ■     | ■     | ■           |
|                                       | Hypotonia                             |                          | ■         | ■     | ■     | ■     | ■     | ■     | ■     | ■           |
|                                       | Seizures                              |                          | ■         | ■     | ■     | ■     | ■     | ■     | ■     | ■           |
|                                       | Encephalopathy                        |                          | ■         | ■     | ■     | ■     | ■     | ■     | ■     | ■           |
|                                       | Spasticity                            |                          | ■         | ■     | ■     | ■     | ■     | ■     | ■     | ■           |
|                                       | Ataxia                                |                          | ■         | ■     | ■     | ■     | ■     | ■     | ■     | ■           |
|                                       | Episodic excited states               |                          | ■         | ■     | ■     | ■     | ■     | ■     | ■     | ■           |
|                                       | Senses                                | Sensorineuronal deafness |           | ■     | ■     | ■     | ■     | ■     | ■     | ■           |
| Visual loss/retinal abnormalities     |                                       |                          | ■         | ■     | ■     | ■     | ■     | ■     | ■     | ■           |
| Strabismus                            |                                       |                          | ■         | ■     | ■     | ■     | ■     | ■     | ■     | ■           |
| Nystagmus                             |                                       |                          | ■         | ■     | ■     | ■     | ■     | ■     | ■     | ■           |
| Dysmorphisms                          | Chubby cheeks                         |                          | ■         | ■     | ■     | ■     | ■     | ■     | ■     | ■           |
|                                       | Facial dysmorphisms                   |                          | ■         | ■     | ■     | ■     | ■     | ■     | ■     | ■           |
|                                       | Abnormalities hands/feet/fingers      |                          | ■         | ■     | ■     | ■     | ■     | ■     | ■     | ■           |
| Growth                                | Dysmaturity                           |                          | ■         | ■     | ■     | ■     | ■     | ■     | ■     | ■           |
|                                       | Failure to thrive                     |                          | ■         | ■     | ■     | ■     | ■     | ■     | ■     | ■           |
| Gastrointestinal tract                | Poor feeding (tube/parenteral)        |                          | ■         | ■     | ■     | ■     | ■     | ■     | ■     | ■           |
|                                       | Diarrrhea/constipation/vomiting       |                          | ■         | ■     | ■     | ■     | ■     | ■     | ■     | ■           |
| Liver                                 | Liver failure/hepatomegaly/cirrhosis  |                          | ■         | ■     | ■     | ■     | ■     | ■     | ■     | ■           |
|                                       | ↓ albumin/protein                     |                          | ■         | ■     | ■     | ■     | ■     | ■     | ■     | ■           |
| Lungs                                 | Interstitial lung disease             |                          | ■         | ■     | ■     | ■     | ■     | ■     | ■     | ■           |
|                                       | Clubbing                              |                          | ■         | ■     | ■     | ■     | ■     | ■     | ■     | ■           |
|                                       | Cystic lung disease                   |                          | ■         | ■     | ■     | ■     | ■     | ■     | ■     | ■           |
|                                       | Oxygen dependency                     |                          | ■         | ■     | ■     | ■     | ■     | ■     | ■     | ■           |
| Bone marrow                           | Anemia                                |                          | ■         | ■     | ■     | ■     | ■     | ■     | ■     | ■           |
|                                       | Leukocytosis                          |                          | ■         | ■     | ■     | ■     | ■     | ■     | ■     | ■           |
|                                       | Thrombocytosis/thrombocytopenia       |                          | ■         | ■     | ■     | ■     | ■     | ■     | ■     | ■           |
| Kidneys                               | Tubulopathy                           |                          | ■         | ■     | ■     | ■     | ■     | ■     | ■     | ■           |
|                                       | Acute kidney failure                  |                          | ■         | ■     | ■     | ■     | ■     | ■     | ■     | ■           |
|                                       | Anatomical/ultrasound abnormalities   |                          | ■         | ■     | ■     | ■     | ■     | ■     | ■     | ■           |
| Spleen                                | Splenomegaly                          |                          | ■         | ■     | ■     | ■     | ■     | ■     | ■     | ■           |
|                                       | Accessory spleen                      |                          | ■         | ■     | ■     | ■     | ■     | ■     | ■     | ■           |
| Heart                                 | Cardiomyopathy/LVH                    |                          | ■         | ■     | ■     | ■     | ■     | ■     | ■     | ■           |
|                                       | Anatomical abnormalities              |                          | ■         | ■     | ■     | ■     | ■     | ■     | ■     | ■           |
| Muscles                               | Exercise intolerance/myalgia/weakness |                          | ■         | ■     | ■     | ■     | ■     | ■     | ■     | ■           |
| Other symptoms                        | Skin abnormalities                    |                          | ■         | ■     | ■     | ■     | ■     | ■     | ■     | ■           |
|                                       | Hydrocele testis                      |                          | ■         | ■     | ■     | ■     | ■     | ■     | ■     | ■           |
|                                       | Hernia inguinalis                     |                          | ■         | ■     | ■     | ■     | ■     | ■     | ■     | ■           |
| Laboratory findings                   | Endocrine abnormalities               |                          | ■         | ■     | ■     | ■     | ■     | ■     | ■     | ■           |
|                                       | Various                               |                          | ■         | ■     | ■     | ■     | ■     | ■     | ■     | ■           |
|                                       | Mitochondrial dysfunction             |                          | ■         | ■     | ■     | ■     | ■     | ■     | ■     | ■           |
|                                       | Other metabolic abnormalities         |                          | ■         | ■     | ■     | ■     | ■     | ■     | ■     | ■           |
| Periods of increased symptom severity | First years of life                   |                          | ■         | ■     | ■     | ■     | ■     | ■     | ■     | ■           |
|                                       | Infections                            |                          | ■         | ■     | ■     | ■     | ■     | ■     | ■     | ■           |

■ reported for 1 patient  
 ■ reported for >1 patient

## Legend to Supplementary Table 1

**Table 1. Summary of clinical symptoms of patients with autosomal recessive aaRS deficiencies and liver symptoms.** Presented are cases reported in literature and supplemented by the case of this report (last column).

Gray squares represent symptoms reported for 1 patient, black squares symptoms reported for >1 patient.

mt, mitochondrial;

MRI, magnetic resonance imaging;

LVH, left ventricular hypertrophy

(modified from Fuchs et al.<sup>S1</sup> with additional data from Williams et al.<sup>S2</sup>, Tracewska-Siemiatkowska et al.<sup>S3</sup>, Xu et al.<sup>S4</sup>, Krenke et al.<sup>S5</sup>, Casey et al.<sup>S6</sup>, Lenz et al.<sup>S7</sup> and Johannesen et al.<sup>S8</sup>)

Supplementary Figure 1

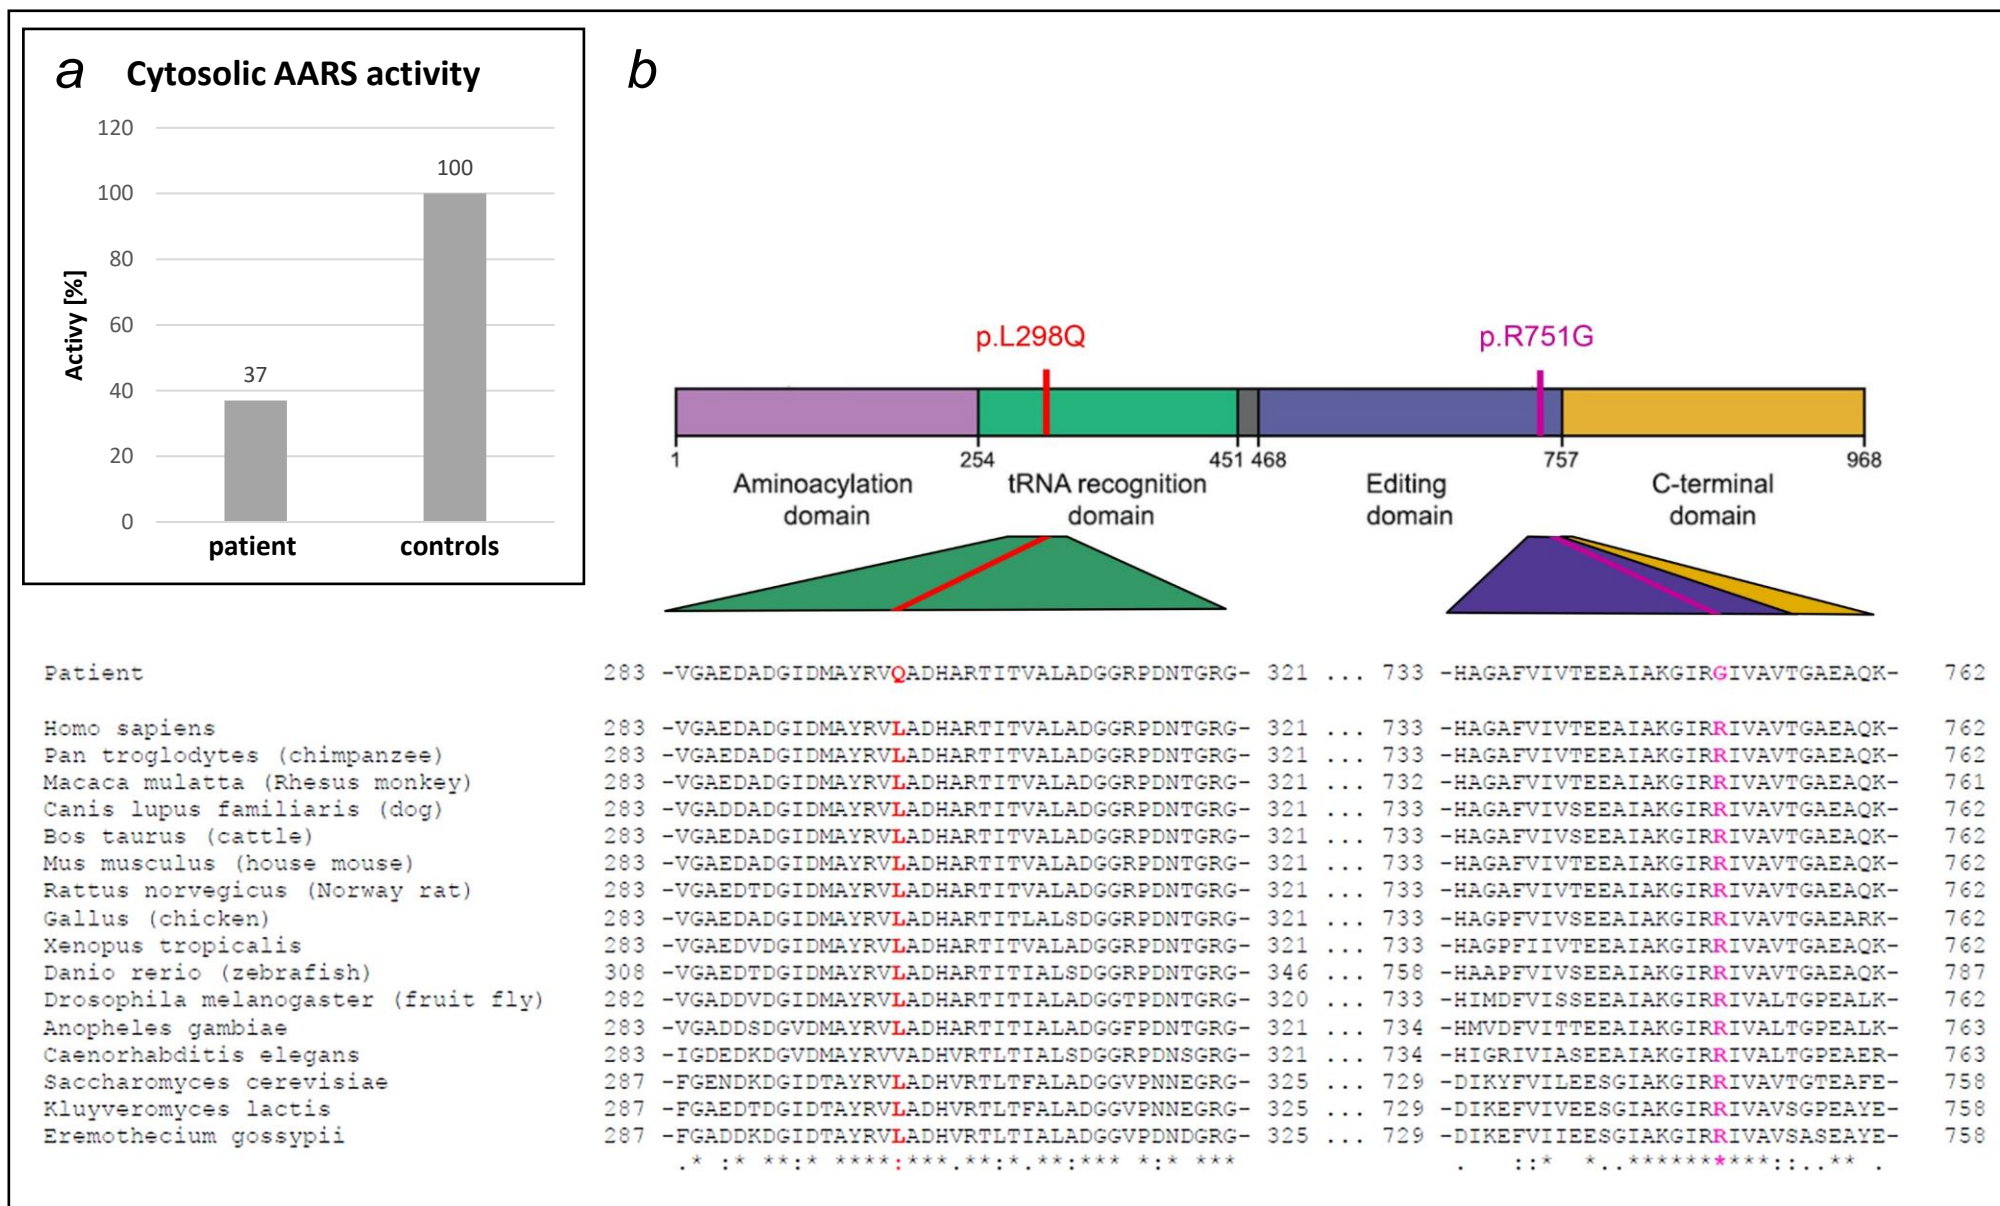

## Legend to Supplementary Figure 1.

### Enzymatic and molecular genetic findings of the reported patient.

**a** Cytosolic AARS activity in patient and control fibroblasts.

**b** Multiple alignment of amino acid sequences of AARS1 from different species. Presented are regions of the protein close to the sites where variants were found in the patient. The maternal *AARS1* variant p.Leu298Gln (p.L298Q, LOVD variant ID 0000701819), affecting the tRNA recognition domain, is indicated in red; the paternal variant p.Arg751Gly (p.R751G, LOVD variant ID 0000701825), located in the editing domain is highlighted in pink (*modified from Simons et al*<sup>S8</sup>). The figure demonstrates the high conservation of the affected regions which indicates pathogenicity. This is further confirmed by the prediction '*disease-causing*' by MutationTaster software<sup>S10</sup> with high scores for both variants. Furthermore, p.Leu298Gln has neither been observed in the '*1000 genomes*' database nor in the Exome Aggregation Consortium (ExAC) and Genome Aggregation database (gnomAD). The *AARS1* variant p.Arg751Gly (rs143370729) has been observed in one heterozygous individual listed in '*1000 genomes*' and 6 heterozygous individuals in the ExAC database (among 66446 European [non-Finnish] individuals) (*data retrieval* Nov 6, 2020). Moreover, it is known to be functionally relevant since it was found in homo- and compound heterozygosity in patients suffering from epileptic encephalopathy type 29 (EIEE29, OMIM #616339) and resulted in severe impairment of enzyme activity during *in vitro* expression.<sup>S9,S11</sup> Compound heterozygosity for the two variants in our patient resulted in the diminished cytosolic AARS activity depicted in panel a.

## References to Supplementary Materials

- S1. Fuchs, S.A., Schene, I.F., Kok, G., et al. Aminoacyl-tRNA synthetase deficiencies in search of common themes.  
*Genet Med.* 2019;21(2):319-330. doi: 10.1038/s41436-018-0048-y.
- S2. Williams KB, Brigatti KW, Puffenberger EG, et al. Homozygosity for a mutation affecting the catalytic domain of tyrosyl-tRNA synthetase (YARS) causes multisystem disease.  
*Hum Mol Genet.* 2019;28(4):525-538. doi:10.1093/hmg/ddy344.
- S3. Tracewska-Sięmiątkowska A, Haer-Wigman L, Bosch DGM, et al. An expanded multi-organ disease phenotype associated with mutations in YARS.  
*Genes (Basel).* 2017;8(12):381. doi:10.3390/genes8120381.
- S4. Xu Z., Lo W.S., Beck D.B., et al. Bi-allelic mutations in Phe-tRNA synthetase associated with a multi-system pulmonary disease support non-translational function.  
*Am J Hum Genet.* 2018;103(1):100-114. doi: 10.1016/j.ajhg.2018.06.006.
- S5. Krenke K., Szczałuba K., Bielecka T., et al. FARSA mutations mimic phenylalanyl-tRNA synthetase deficiency caused by FARSB defects.  
*Clin Genet.* 2019;96(5):468-472. doi: 10.1111/cge.13614.
- S6. Casey J.P., Slattery S., Cotter M., et al. Clinical and genetic characterisation of infantile liver failure syndrome type 1, due to recessive mutations in LARS.  
*J Inherit Metab Dis.* 2015;38(6):1085-92. doi: 10.1007/s10545-015-9849-1.
- S7. Lenz D, Smith DEC, Crushell E, et al. Genotypic diversity and phenotypic spectrum of infantile liver failure syndrome type 1 due to variants in LARS1.  
*Genet Med.* 2020;22(11):1863-1873. doi:10.1038/s41436-020-0904-4.
- S8. Johannesen KM, Mitter D, Janowski R, et al. Defining and expanding the phenotype of *QARS*-associated developmental epileptic encephalopathy.  
*Neurol Genet.* 2019;5(6):e373. doi: 10.1212/NXG.0000000000000373.
- S9. Simons, C., Griffin, L.B., Helman, G., et al. Loss-of-function alanyl-tRNA synthetase mutations cause an autosomal-recessive early-onset epileptic encephalopathy with persistent myelination defect.  
*Am J Hum Genet.* 2015;96(4):675-681. doi: 10.1016/j.ajhg.2015.02.012.
- S10. Schwarz, J.M., Cooper, D.N., Schuelke, M., et al. MutationTaster2: mutation prediction for the deep-sequencing age.

*Nat Methods*. 2014;11(4):361-362. doi: 10.1038/nmeth.2890.

S11. Nakayama, T., Wu, J., Galvin-Parton, P., et al. Deficient activity of alanyl-tRNA synthetase underlies an autosomal recessive syndrome of progressive microcephaly, hypomyelination, and epileptic encephalopathy.

*Hum Mutat*. 2017;38(10):1348-1354. doi:10.1002/humu.23250
